# Supplementary material for: A Human Brain Microphysiological System Derived from Induced Pluripotent Stem Cells to Study Neurological Diseases and Toxicity
Source: PubMed Central journal article supplement (PMC6047513; doi:10.14573/altex.1609122), 2016-11-24
Supplement: NIHMS977950-supplement-Supp.pdf [file NIHMS977950-supplement-Supp.pdf]

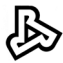

Pamies et al.:

# A Human Brain Microphysiological System Derived from Induced Pluripotent Stem Cells to Study Neurological Diseases and Toxicity

## Supplementary Data

Tab. S1: Flow cytometry raw data

| NPCs          |   |        |       |
|---------------|---|--------|-------|
| Antibody name | n | Mean % | SEM   |
| DCX           | 4 | 3.96   | 2.00  |
| Ki67          | 4 | 2.27   | 6.79  |
| SOX1          | 4 | 60.07  | 3.30  |
| SOX2          | 4 | 46.02  | 14.20 |
| Nestin        | 4 | 68.42  | 6.03  |
| Tuj1          | 4 | 58.96  | 3.05  |
| 2 weeks       |   |        |       |
| Antibody name | n | Mean % | SEM   |
| DCX           | 4 | 21.89  | 8.24  |
| Ki67          | 3 | 8.85   | 3.18  |
| SOX1          | 3 | 20.27  | 6.86  |
| SOX2          | 3 | 22.31  | 6.99  |
| Nestin        | 4 | 9.87   | 4.36  |
| Tuj1          | 3 | 69.52  | 5.61  |

| 4 weeks       |   |        |       |
|---------------|---|--------|-------|
| Antibody name | n | Mean % | SEM   |
| DCX           | 3 | 17.14  | 4.68  |
| Ki67          | 4 | 6.97   | 1.18  |
| SOX1          | 5 | 11.12  | 5.22  |
| SOX2          | 3 | 9.64   | 3.59  |
| Nestin        | 3 | 7.06   | 4.10  |
| Tuj1          | 3 | 77.21  | 1.91  |
| 8 weeks       |   |        |       |
| Antibody name | n | Mean % | SEM   |
| DCX           | 4 | 3.65   | 1.14  |
| Ki67          | 4 | 1.37   | 0.36  |
| SOX1          | 4 | 1.68   | 0.72  |
| SOX2          | 4 | 2.79   | 1.19  |
| Nestin        | 4 | 1.89   | 0.73  |
| Tuj1          | 3 | 71.53  | 22.15 |

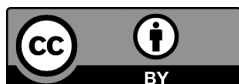

This is an Open Access article distributed under the terms of the Creative Commons Attribution 4.0 International license (<http://creativecommons.org/licenses/by/4.0/>), which permits unrestricted use, distribution and reproduction in any medium, provided the original work is appropriately cited.

doi:10.14573/altex.1609122s1

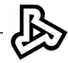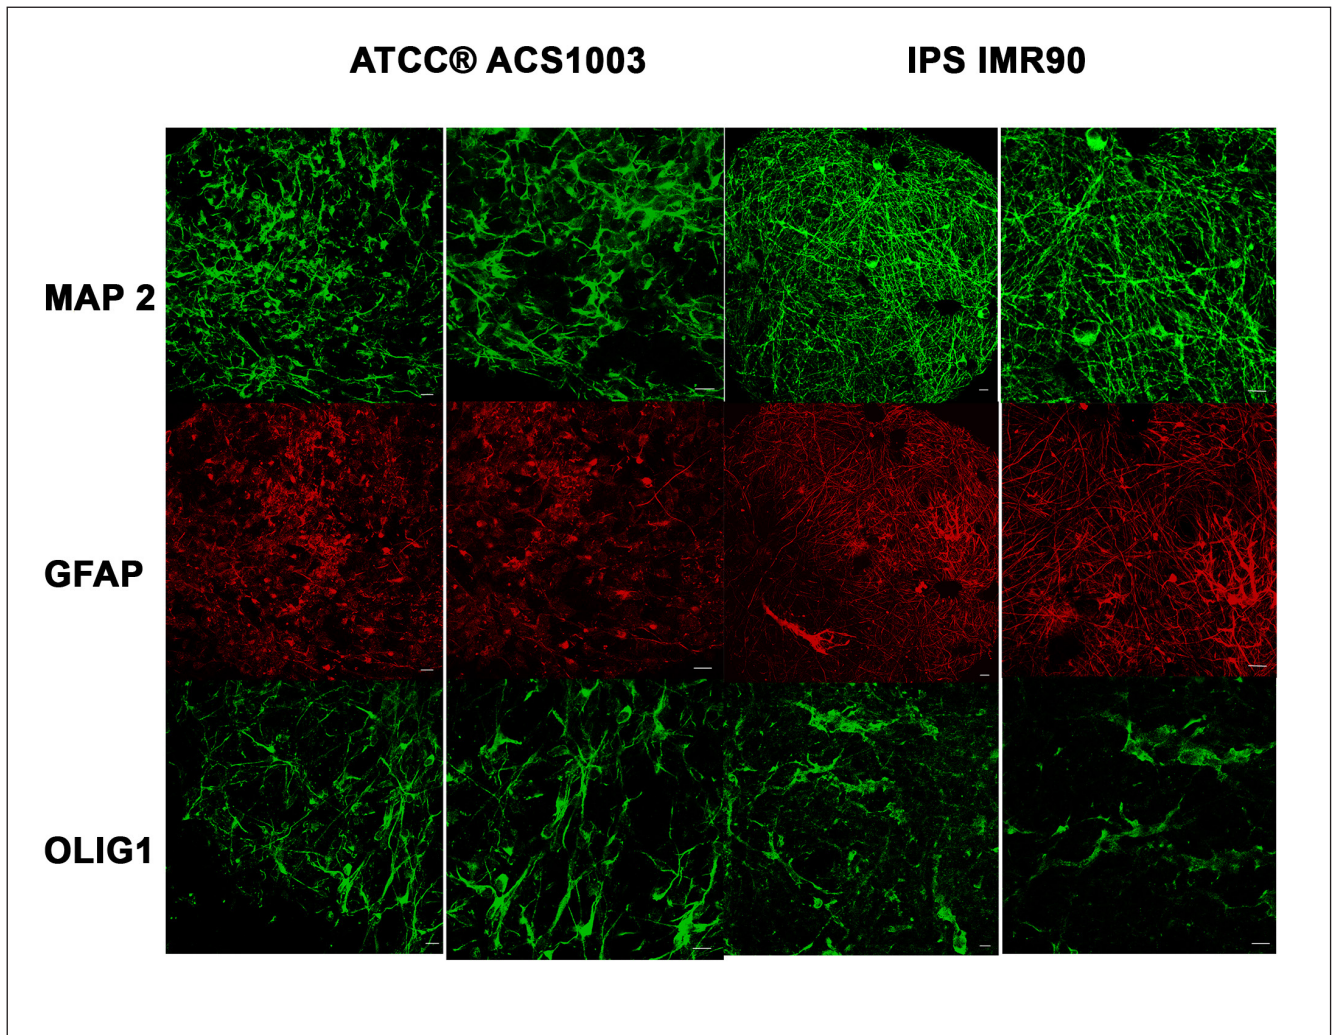

**Fig. S1: IPS IMR90 and DYP0730 derived iPSC**

MAP2 (neurons), GFAP (astrocytes) and OLIG1 (oligodendrocytes) immunohistochemistry characterization.

**Video**

Video at doi:10.14573/altex.1609122s2
